# Supplementary material for: Ultra-trace determination of sodium fluoroacetate (1080) as monofluoroacetate in milk and milk powder by GC-MS/MS and LC-MS/MS
Source: Royal Society of Chemistry journal article supplement (doi:10.1039/c8ay00767e), 2018-01-01
Supplement: c8ay00767e1.pdf [file c8ay00767e1.pdf]

1 **Analytical Methods**

2

3 **Electronic Supplementary Information**

4

5

6 Ultra-trace determination of sodium fluoroacetate (1080) as  
7 monofluoroacetate in milk and milk powder by GC-MS/MS and LC-  
8 MS/MS

9

10 Yiu-Tung Wong\*, Wing-Ki Law, Shirley Sau-Ling Lai, Siu-Pan Wong, Kong-Chi  
11 Lau and Clare Ho

12

13

14 Analytical and Advisory Services Division, Government Laboratory,  
15 7/F, Ho Man Tin Government Offices, Ho Man Tin, Kowloon,  
16 Hong Kong Special Administrative Region, China

17

18 \*Corresponding author: Dr. Yiu-Tung Wong, Tel.:+852 27623833

19 E-mail address: ytwong@govtlab.gov.hk

20

21

22

23

24

25

26

27

28

29

30

31

32

33

34

35

36

37

38

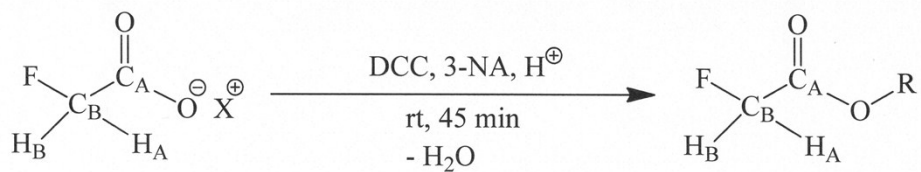

| Compound                                             | C <sub>A</sub>  | C <sub>B</sub>  | H <sub>A</sub> | H <sub>B</sub> | X               | R |
|------------------------------------------------------|-----------------|-----------------|----------------|----------------|-----------------|---|
| 1080                                                 | <sup>12</sup> C | <sup>12</sup> C | H              | H              | Na <sup>⊕</sup> | - |
| MFA                                                  | <sup>12</sup> C | <sup>12</sup> C | H              | H              | -               | - |
| MFAA                                                 | <sup>12</sup> C | <sup>12</sup> C | H              | H              | H <sup>⊕</sup>  | - |
| <sup>13</sup> C <sub>2</sub> D <sub>2</sub> -MFA     | <sup>13</sup> C | <sup>13</sup> C | D              | D              | Na <sup>⊕</sup> | - |
| MFA-3NA                                              | <sup>12</sup> C | <sup>12</sup> C | H              | H              | -               |   |
| <sup>13</sup> C <sub>2</sub> D <sub>2</sub> -MFA-3NA | <sup>13</sup> C | <sup>13</sup> C | D              | D              | -               |   |

39

40 **Fig. S1** Structures of 1080, its related compounds and derivatization conditions for  
41 MFA

42

43

44

45

46

47

48

49

50

51

52

53

54

55

56

57

58

59

60

61 **Table S1** Types of milk and milk powder samples used in this study

62

| Matrix type | Sample type         | Category                   | Age group                   | Ingredient type   | No. of brands used | Country of origin |
|-------------|---------------------|----------------------------|-----------------------------|-------------------|--------------------|-------------------|
| Milk        | A                   | Infant milk liquid formula | 0 – 6 months                | Cow's milk based  | 2                  | Malaysia          |
|             |                     |                            |                             |                   |                    | USA               |
|             | B                   | Fresh milk                 | --                          | Cow's milk based  | 1                  | Hong Kong         |
| Milk powder | C                   | Infant formula             | 0 – 6 months                | Cow's milk based  | 2                  | Spain             |
|             |                     |                            |                             |                   |                    | Germany           |
|             | D                   | Stage 2                    | 6 – 12 months               | Cow's milk based  | 2                  | USA               |
|             |                     |                            |                             |                   |                    | Netherlands       |
|             | E                   | Stage 3                    | 1 – 3 years                 | Cow's milk based  | 2                  | New Zealand       |
|             |                     |                            |                             |                   |                    | USA               |
|             | F                   | Stage 4                    | > 3 years                   | Cow's milk based  | 2                  | New Zealand       |
|             | G                   | Growing up formula         | > 12 months                 | Goat's milk based | 1                  | New Zealand       |
|             |                     | Goat whole milk powder     | 7 years or above and adults | Goat's milk based | 1                  | New Zealand       |
| H           | Stage 2             | 6 – 12 months              | Soy milk based              | 1                 | USA                |                   |
| I           | Whey protein powder | > 3 years                  | Pure whey protein           | 1                 | Switzerland        |                   |

63

64

65 **Table S2** A series of EWG substituted anilines evaluated for the MFA derivatization

66

| EWG substituted aniline | Molecular formula of the derivative                          | Nominal mass (m/z) | Most abundant precursor ion (m/z) | In-source fragmentation | Remarks     |
|-------------------------|--------------------------------------------------------------|--------------------|-----------------------------------|-------------------------|-------------|
| 2,4-DCA                 | C <sub>8</sub> H <sub>6</sub> Cl <sub>2</sub> FNO            | 221                | 201                               | YES                     | --          |
| 3,4-DCA                 | C <sub>8</sub> H <sub>6</sub> Cl <sub>2</sub> FNO            | 221                | 201                               | YES                     | --          |
| 3,5-DCA                 | C <sub>8</sub> H <sub>6</sub> Cl <sub>2</sub> FNO            | 221                | 201                               | YES                     | --          |
| 2,4-DFA                 | C <sub>8</sub> H <sub>6</sub> F <sub>3</sub> NO              | 189                | 169                               | YES                     | --          |
| 3,4-DFA                 | C <sub>8</sub> H <sub>6</sub> F <sub>3</sub> NO              | 189                | 169                               | YES                     | --          |
| 3,5-DFA                 | C <sub>8</sub> H <sub>6</sub> F <sub>3</sub> NO              | 189                | 169                               | YES                     | --          |
| 2-NA                    | C <sub>8</sub> H <sub>7</sub> FN <sub>2</sub> O <sub>3</sub> | 198                | 198                               | NO                      | --          |
| 3-NA                    | C <sub>8</sub> H <sub>7</sub> FN <sub>2</sub> O <sub>3</sub> | 198                | 198                               | NO                      | --          |
| 3,5-DNA                 | C <sub>8</sub> H <sub>6</sub> FN <sub>3</sub> O <sub>5</sub> | 225                | --                                | --                      | No reaction |

67

68

69

70

71

72

73

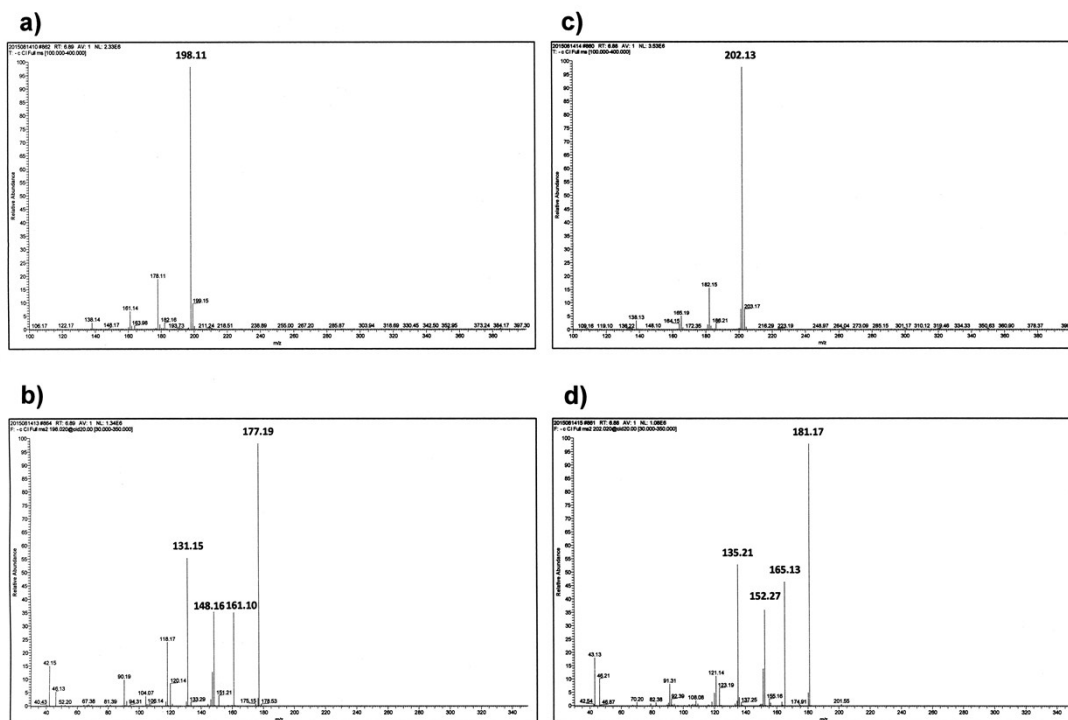

74

75 **Fig. S2** a) GC-NCI-MS full scan spectra of MFA-3NA; b) GC-NCI-MS/MS product  
 76 ion scan spectra of MFA-3NA; c) GC-NCI-MS full scan spectra of  $^{13}\text{C}_2\text{D}_2$ -MFA-3NA  
 77 and d) GC-NCI-MS/MS product ion scan spectra of  $^{13}\text{C}_2\text{D}_2$ -MFA-3NA.

78

79

80

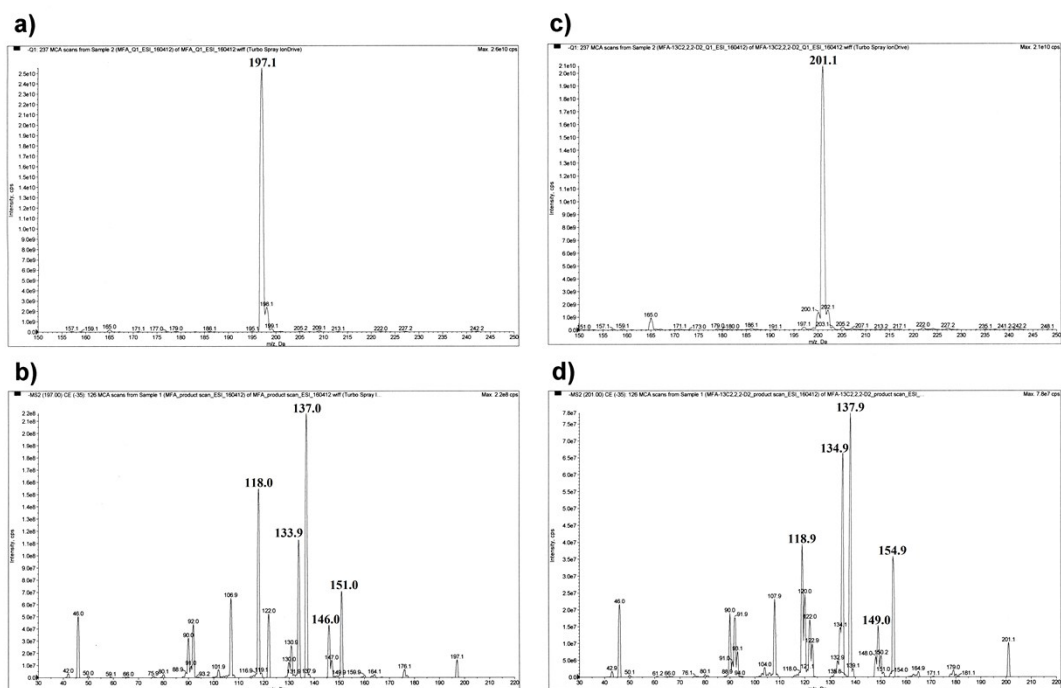

81

82 **Fig. S3** a) Negative ion ESI full scan spectra of MFA-3NA; b) Negative ion LC-ESI-  
 83 MS/MS product ion scan spectra of MFA-3NA; c) Negative ion ESI full scan spectra  
 84 of  $^{13}\text{C}_2\text{D}_2$ -MFA-3NA and d) Negative ion LC-ESI-MS/MS product ion scan spectra of  
 85  $^{13}\text{C}_2\text{D}_2$ -MFA-3NA.

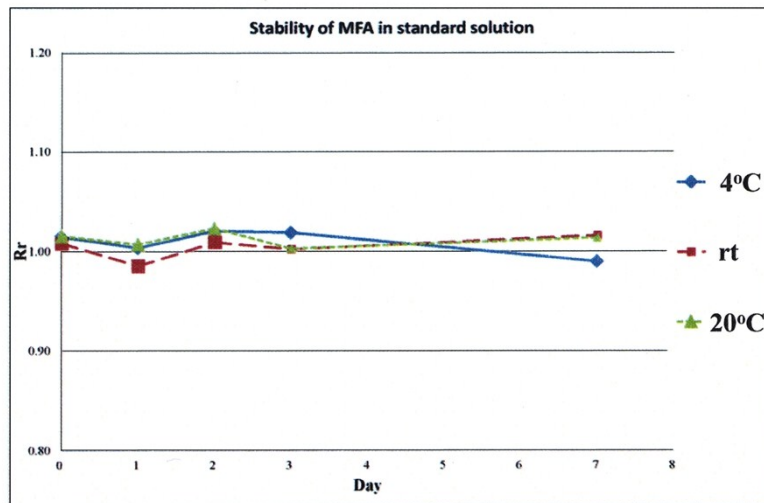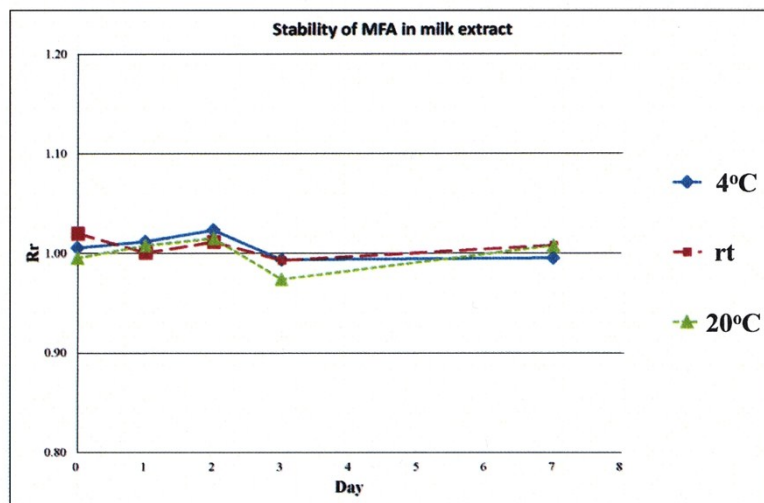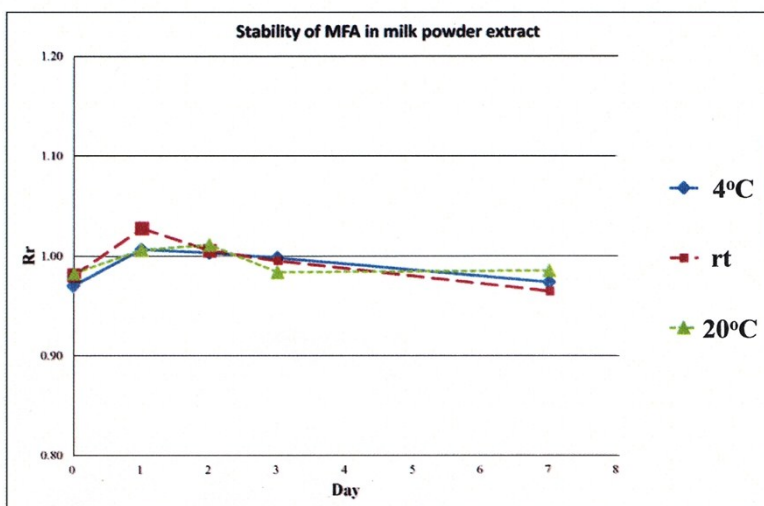

86

87 **Fig. S4** Stability of MFA-3NA in different matrices and under different storage

88 temperatures

89 **Table S3 a)** MRM transitions monitored in GC-MS/MS analysis (CI, -ve mode).

| <b>Compound</b>                                      | <b>Precursor Ion (m/z)</b> | <b>Product Ion (m/z)</b> | <b>CE (eV)</b> | <b>Remark</b>       |
|------------------------------------------------------|----------------------------|--------------------------|----------------|---------------------|
| MFA-3NA                                              | 198                        | 131                      | 25             | Qualification       |
|                                                      | <b>198</b>                 | <b>161</b>               | <b>10</b>      | <b>Quantitation</b> |
| <sup>13</sup> C <sub>2</sub> D <sub>2</sub> -MFA-3NA | 198                        | 177                      | 15             | Qualification       |
|                                                      | 202                        | 135                      | 25             | Qualification       |
|                                                      | <b>202</b>                 | <b>165</b>               | <b>10</b>      | <b>Quantitation</b> |
|                                                      | 202                        | 181                      | 10             | Qualification       |

90

91 **b)** MRM transitions monitored in LC-MS/MS analysis (ESI, -ve mode).

| <b>Compound</b>                                      | <b>Precursor Ion (m/z)</b> | <b>Product Ion (m/z)</b> | <b>DP (V)</b> | <b>CE (V)</b> | <b>Remark</b>       |
|------------------------------------------------------|----------------------------|--------------------------|---------------|---------------|---------------------|
| MFA-3NA                                              | <b>197</b>                 | <b>118</b>               | <b>-44</b>    | <b>25</b>     | <b>Quantitation</b> |
|                                                      | 197                        | 134                      | -80           | -24           | Qualification       |
|                                                      | 197                        | 137                      | -80           | -24           | Qualification       |
|                                                      | 197                        | 146                      | -51           | -33           | Qualification       |
|                                                      | 197                        | 151                      | -80           | -28           | Qualification       |
| <sup>13</sup> C <sub>2</sub> D <sub>2</sub> -MFA-3NA | <b>201</b>                 | <b>119</b>               | <b>-66</b>    | <b>-28</b>    | <b>Quantitation</b> |
|                                                      | 201                        | 135                      | -40           | -35           | Qualification       |
|                                                      | 201                        | 138                      | -30           | -27           | Qualification       |
|                                                      | 201                        | 149                      | -30           | -32           | Qualification       |
|                                                      | 201                        | 155                      | -60           | -35           | Qualification       |

92

93 **Table S4** LODs, LOQs, slopes and intercepts of the solution and matrix-matched calibration curves of MFA with regression statistics by GC-  
 94 MS/MS and LC-MS/MS

| <b>Matrix</b> | <b>Technique</b> | <b>a</b>               | <b>b</b> | <b>r<sup>2</sup></b> | <b>s<sub>b</sub></b>  | <b>s<sub>y/x</sub></b> | <b>F</b>             | <b>p</b> | <b>LOD</b>   | <b>LOQ</b>   |
|---------------|------------------|------------------------|----------|----------------------|-----------------------|------------------------|----------------------|----------|--------------|--------------|
| Solution      | GC-MS/MS         | $1.59 \times 10^{-3}$  | 0.0137   | 0.999                | $9.07 \times 10^{-5}$ | 0.0165                 | $5.1 \times 10^{-4}$ | 1.00     | --           | --           |
|               | LC-MS/MS         | $1.30 \times 10^{-3}$  | 0.0233   | 1.00                 | $3.04 \times 10^{-5}$ | $5.54 \times 10^{-3}$  | 0.66                 | 0.63     | --           | --           |
| Milk          | GC-MS/MS         | $4.03 \times 10^{-4}$  | 0.0133   | 1.00                 | $2.95 \times 10^{-5}$ | $5.38 \times 10^{-3}$  | 0.64                 | 0.65     | 0.0013 µg/L  | 0.0042 µg/L  |
|               | LC-MS/MS         | $-2.43 \times 10^{-3}$ | 0.0241   | 1.00                 | $4.08 \times 10^{-5}$ | $7.43 \times 10^{-3}$  | 2.19                 | 0.13     | 0.00010 µg/L | 0.00033 µg/L |
| Milk powder   | GC-MS/MS         | $6.83 \times 10^{-3}$  | 0.0127   | 1.00                 | $3.22 \times 10^{-5}$ | $5.87 \times 10^{-3}$  | 0.24                 | 0.91     | 0.0025 µg/kg | 0.0085 µg/kg |
|               | LC-MS/MS         | $4.84 \times 10^{-4}$  | 0.0242   | 1.00                 | $3.86 \times 10^{-5}$ | $7.03 \times 10^{-3}$  | 0.027                | 1.00     | 0.0026 µg/kg | 0.0088 µg/kg |

95 Remarks: The linear regression equations of the calibration curves were expressed in the form of  $y = bx + a$  (where  $y$  = area of analyte divided by the area of internal standard,  
 96  $b$  = slope of the regression line,  $x$  = concentration of analyte,  $a$  = intercept of the regression line,  $r^2$  = square of correlation coefficient,  $s_b$  = standard deviation of slope,  $s_{y/x}$  =  
 97 standard error of estimate).  $F$  =  $F$ -statistic and  $p$  =  $p$ -value of the lack-of-fit test.

98  
 99  
 100  
 101  
 102  
 103  
 104



105 **Table S5** Comparison of the recovery data of MFA at different I.S. fortification levels based on Student's *t*-test

| Matrix Type | Sample Type                | Measurement Technique | Low I.S. spike    |        | High I.S. spike   |        | Student's <i>t</i> -test |          |
|-------------|----------------------------|-----------------------|-------------------|--------|-------------------|--------|--------------------------|----------|
|             |                            |                       | Mean Recovery (%) | SD (%) | Mean Recovery (%) | SD (%) | <i>t</i> -value          | <i>p</i> |
| Milk Powder | Cow's milk based           | GC-MS/MS              | 99                | 4.2    | 97                | 1.4    | 0.89                     | 0.43     |
|             | Whey protein               | GC-MS/MS              | 100               | 6.1    | 94                | 2.6    | 1.7                      | 0.17     |
|             | Soy milk based             | LC-MS/MS              | 98                | 1.6    | 96                | 0.32   | 1.4                      | 0.24     |
|             | Goat's milk based          | LC-MS/MS              | 99                | 2.3    | 99                | 1.6    | 0.50                     | 0.64     |
| Milk        | Infant milk liquid formula | GC-MS/MS              | 100               | 5.3    | 99                | 1.8    | 0.22                     | 0.83     |
|             | Fresh milk                 | LC-MS/MS              | 92                | 5.1    | 100               | 2.6    | 2.4                      | 0.075    |

106 Remarks: Mean recovery was calculated from three independent determinations (N = 3). Critical *t*-value = 2.78 ( $\alpha = 0.05$  with degree of  
 107 freedom = 4).

108

109
